# Utility of estimated pulse wave velocity for assessing vascular stiffness: comparison of methods

Stefan Möstl<sup>1\*</sup>, Fabian Hoffmann<sup>1,2\*</sup>, Jan-Niklas Hönemann<sup>1,2</sup>, Jose Ramon Alvero-Cruz<sup>3</sup>, Jörn Rittweger<sup>4</sup>, Jens Tank<sup>1</sup> and Jens Jordan<sup>5,6</sup>

1 Department of Cardiovascular Aerospace Medicine, Institute of Aerospace Medicine, German Aerospace Center, Cologne, Germany

2 Department of Cardiology, University Hospital Cologne, Germany

3 Department of Human Physiology and Physical Sports Education, Faculty of Medicine, University of Málaga, Spain

4 Department of Muscle and Bone Metabolism, Institute of Aerospace Medicine, German Aerospace Center, Cologne, Germany

5 Institute of Aerospace Medicine, German Aerospace Center, Cologne, Germany

6 Chair of Aerospace Medicine, University of Cologne, Cologne, Germany

Short Title: Estimated pulse wave velocity

Word Count: 1263/1500

References: 10/10

Key words: pulse wave velocity, aging, hypertension-mediated organ damage, hemodynamics, prevention

\*authors contributed equally

## Corresponding author:

Jens Jordan M.D.  
Institute of Aerospace Medicine  
German Aerospace Center  
Linder Hoehe  
51147 Cologne, Germany  
[jens.jordan@dlr.de](mailto:jens.jordan@dlr.de)

31 Abstract

32 Aim. Pulse wave velocity independently predicts cardiovascular risk. Easy to use single  
33 cuff oscillometric methods are utilized in clinical practice to estimate pulse wave  
34 velocity. We applied the approach in master athletes to assess possible beneficial  
35 effects of lifelong exercise on vascular health. Furthermore, we compared single cuff  
36 measurements with a two-cuff method in another cohort.

37 Methods. We obtained single cuff upper arm oscillometric measurements thrice in 129  
38 master athletes aged 35 to 86 years and estimated pulse wave velocity using the  
39 ArcSolver algorithm. We applied the same method in 24 healthy persons aged 24 to  
40 55 years participating in a head down tilt bedrest study. In the latter group, we also  
41 obtained direct pulse wave velocity measurements using a thigh cuff.

42 Results. Estimated pulse velocity very highly correlated with age ( $R^2 = 0.90$ ) in master  
43 athletes. Estimated pulse wave velocity values were located on the same regression  
44 line like values obtained in participants of the head down tilt bed rest study. The modest  
45 correlation between estimated and measured PWV ( $r^2 0.40$ ;  $p < 0.05$ ) was attenuated  
46 after adjusting for age; the mean difference between pulse wave velocity  
47 measurements was 1 m/s.

48 Conclusion. Estimated pulse wave velocity mainly reflects the entered age rather than  
49 true vascular properties and, therefore, failed detecting beneficial effects of life long  
50 exercise.

51 Funding. The AGBRESA-Study was funded by the German Aerospace Center (DLR),  
52 the European Space Agency (ESA, contract number 4000113871/15/NL/PG) and the  
53 National Aeronautics and Space Administration (NASA, contract number  
54 80JSC018P0078). FH received funding by the DLR and the German Federal Ministry  
55 of Economy and Technology, BMWi (50WB1816). SM, JT and JJ were supported by

56 the Austrian Federal Ministry for Climate Action, Environment, Energy, Mobility,  
57 Innovation and Technology, BMK (SPACE4ALL Project, FFG No. 866761).

58

### 59 Main Text

60 Aortic pulse wave velocity (PWV) which relates to vascular stiffness, independently  
61 predicts cardiovascular risk including stroke <sup>1,2</sup>. PWV values above 10 m/s have been  
62 suggested as threshold indicating increased risk <sup>3</sup> and are included in current  
63 hypertension guidelines for assessing hypertension-mediated organ damage and  
64 guiding secondary prophylaxis <sup>4</sup>. However, these guidelines do not specify certain  
65 methods to measure PWV. Because measurements at different sites including the  
66 thigh are required, PWV-assessment is difficult to implement in busy clinics or in large  
67 scale studies. Oscillometric blood pressure monitors estimating PWV based on age  
68 and blood pressure could simplify vascular assessment <sup>1,5</sup>. Indeed, estimated PWV  
69 correlates with age <sup>6</sup> and invasively measured PWV <sup>1</sup>. These monitors operate  
70 observer-independent, are easy to use, and are, therefore, applied in clinical practice  
71 and in clinical studies alike <sup>7</sup>. However, in a study investigating beneficial effects of  
72 competitive life-long physical exercise in elite Masters Athletes, we obtained estimated  
73 PWV results suggesting that the approach adds little information to classical  
74 cardiovascular risk assessment. We decided comparing the methodology with aortic  
75 PWV measurements in an independent set of healthy persons participating in a head-  
76 down-tilt bedrest study.

77 All subjects provided informed consent before enrollment. Studies were  
78 approved by the Northrhine-Medical-Association (Ärzttekammer Nordrhein) ethics  
79 committee and registered at the German Clinical Trial Register (DRKS00015677 and  
80 DRKS00015172). According to Kolmogorov-Smirnov-Test, all data were normally

81 distributed and results are reported as mean values  $\pm$  standard deviation. Based on  
82 other cardiovascular risk-estimate-models, we used a quadratic regression model.

83 During the 23<sup>rd</sup> Masters Athletics Championships 2018 in Málaga, Spain, we  
84 approached 163 master athletes. We excluded athletes with atrial fibrillation or  
85 significant cardiovascular disease assessed by echocardiography. In the remaining  
86 129 athletes (88 men/41 women,  $56\pm 11$  (range 35-86) years,  $24.0\pm 3.5$  kg/m<sup>2</sup>), we  
87 acquired blood pressure, heart rate, and estimated PWV thrice on the same arm after  
88 10 minutes supine rest (Arc-Solver-Algorithm, CardioCube, AIT, Vienna, Austria).  
89 Resting heart rate was  $61\pm 11$  bpm and blood pressure was  $128\pm 15/78\pm 8$  mmHg.  
90 Estimated PWV ranged from 5.5-14.5 with a mean of  $8.3\pm 1.8$  m/s. In a quadratic  
91 regression model, age and mean arterial pressure predicted estimated PWV (beta-  
92 value 0.93 and 0.14,  $p<0.001$ ), whereas sex and BMI had no influence. The model  
93 explained 95% ( $R^2=0.95$ ) of estimated PWV's variance. Age alone explained 90%  
94 ( $R^2=0.90$ ).

95 In 24 healthy participants (16 men/8 women,  $33\pm 9$  years,  $24.3\pm 2.1$  kg/m<sup>2</sup>) of the  
96 AGBRESA (artificial gravity bedrest) study, which was conducted in collaboration with  
97 NASA and ESA in Cologne, Germany <sup>8</sup>, we assessed estimated PWV before head-  
98 down-tilt bedrest as described above. As the estimated PWV has been validated  
99 against invasive catheter measurements derived from the ascending aorta to the aortic  
100 bifurcation <sup>1</sup>, we mimicked this approach non-invasively by measuring pulse wave  
101 arrival time from the electrocardiographic R-Peak to the arrival of the pulse wave at an  
102 oscillometric thigh-cuff. We corrected pulse wave arrival time for isovolumetric  
103 contraction time assessed by 2D-Pulsed-Wave-Doppler echocardiography. Dividing  
104 jugulum-thigh cuff distance by corrected pulse wave arrival time resulted in measured  
105 PWV.

106 Resting heart rate was  $62\pm 9$  bpm and blood pressure was  $125\pm 11/70\pm 7$  mmHg.  
107 Estimated PWV was  $5.8\pm 1.1$  m/s and measured PWV was  $4.8\pm 0.6$ . Age and estimated  
108 PWV were highly correlated ( $R^2$  0.88,  $p<0.001$ , Figure 1A). The correlation between  
109 measured PWV and age was weaker ( $R^2$  0.55,  $p<0.001$ ). In a quadratic regression  
110 model, age (beta-value 0.99,  $p<0.001$ ) but not body-mass-index, sex, or mean arterial  
111 pressure predicted estimated PWV. The model explained 98% of estimated PWV's  
112 variance.  $R^2$  between estimated and measured PWV was 0.40 ( $p<0.05$ ). We observed  
113 an increasing bias between estimated and measured PWV with advancing age with an  
114 average  $0.96\pm 0.83$  m/s difference between methods (Figure 1B). When adjusting the  
115 correlation of measured and estimated PWV for age we could no longer observe a  
116 significant relationship ( $p=0.267$ ).

117 To assess influences of entered rather than chronological age on estimated  
118 PWV, we repeated measurements in one male person, who is in his 50s and has  
119 normal BMI, and randomly changed the entered age in decades from 30-80 years. We  
120 obtained measurements in each entered age decade thrice. Again, estimated PWV  
121 related to entered age ( $R^2$  0.996,  $p<0.001$ , figure 1C) akin to the relationship between  
122 estimated PWV and chronological age in athletes and in bedrest-study participants.

123 The idea of obtaining vascular measurements, such as PWV, is gaining insight  
124 in individual vascular risk above and beyond traditional risk factors. The clinical goal is  
125 to target preventive measures to patients most likely to benefit. Similarly to other  
126 studies<sup>6</sup>, we observed an almost perfect correlation between estimated PWV and age  
127 in two independent cohorts. Strikingly, estimated PWV in elite master athletes, which  
128 would be expected to benefit from life-long exercise, and in healthy bedrest study  
129 participants of average physical fitness were located on the same regression line.  
130 Suffice it to say that many athletes were frustrated when we reported their findings.

131           Theoretically, our findings could result from methodological limitations of PWV  
132 estimates or a rather limited effect of lifelong exercise on aortic stiffness. A previous  
133 study showed significantly lower measured PWV in endurance trained compared to  
134 sedentary older men <sup>9</sup> making a methodological limitation more likely. Indeed, in our  
135 study, estimated PWV substantially overestimated PWV, particularly in older persons.  
136 Moreover, the modest correlation between estimated and measured PWV was  
137 attenuated after adjusting for age in our relatively small bedrest cohort. Finally, in a  
138 previous study, estimated PWV highly correlated with PWV calculated solely from age  
139 and blood pressure <sup>5</sup>. Thus, the algorithm providing PWV estimates appears to weigh  
140 age so strongly that subtle influences on vascular wall properties caused by  
141 hemodynamic changes and physical training cannot be discerned. Even more so,  
142 estimated PWV mainly reflects data entered prior to measuring blood pressure rather  
143 than true vascular properties. The clinical implication is that estimated PWV is no  
144 substitute for measured PWV, which likely limits the utility the methodology in  
145 individualizing risk assessment. In fact, simply asking the patient in front of us for his  
146 or her age and measuring blood pressure provides almost as much information as  
147 estimating PWV. Instead, vascular ageing assessment using established  
148 methodologies rather than estimates should be considered <sup>10</sup>.

149

## 150 **Acknowledgements**

151 We would like to thank Siegfried Wassertheurer, Bernhard Hametner and Martin  
152 Bachler from the Austrian Institute of Technology for providing the CardioCube.

## 153 **Disclosures**

154 We declare no conflict of interest.

- 155 1. Hametner B, Wassertheurer S, Kropf J, Mayer C, Eber B, Weber T. Oscillometric estimation of  
156 aortic pulse wave velocity: Comparison with intra-aortic catheter measurements. *Blood*  
157 *pressure monitoring*. 2013;18:173-176
- 158 2. Vishram-Nielsen JKK, Laurent S, Nilsson PM, Linneberg A, Sehested TSG, Greve SV, Pareek M,  
159 Palmieri L, Giampaoli S, Donfrancesco C, Kee F, Mancina G, Cesana G, Veronesi G, Kuulasmaa K,  
160 Salomaa V, Kontto J, Palosaari T, Sans S, Ferrieres J, Dallongeville J, Söderberg S, Moitry M,  
161 Drygas W, Tamosiunas A, Peters A, Brenner H, Njolstad I, Olsen MH. Does estimated pulse  
162 wave velocity add prognostic information?: Morgam prospective cohort project. *Hypertension*.  
163 2020;75:1420-1428
- 164 3. Van Bortel LM, Laurent S, Boutouyrie P, Chowienczyk P, Cruickshank JK, De Backer T, Filipovsky  
165 J, Huybrechts S, Mattace-Raso FU, Protogerou AD, Schillaci G, Segers P, Vermeersch S, Weber  
166 T. Expert consensus document on the measurement of aortic stiffness in daily practice using  
167 carotid-femoral pulse wave velocity. *J Hypertens*. 2012;30:445-448
- 168 4. Williams B, Mancina G, Spiering W, Agabiti Rosei E, Azizi M, Burnier M, Clement DL, Coca A, de  
169 Simone G, Dominiczak A, Kahan T, Mahfoud F, Redon J, Ruilope L, Zanchetti A, Kerins M,  
170 Kjeldsen SE, Kreutz R, Laurent S, Lip GYH, McManus R, Narkiewicz K, Ruschitzka F, Schmieder  
171 RE, Shlyakhto E, Tsioufis C, Aboyans V, Desormais I. 2018 esc/esh guidelines for the  
172 management of arterial hypertension: The task force for the management of arterial  
173 hypertension of the european society of cardiology and the european society of hypertension.  
174 *J Hypertens*. 2018;36:1953-2041
- 175 5. Hametner B, Wassertheurer S, Mayer CC, Danninger K, Binder RK, Weber T. Aortic pulse wave  
176 velocity predicts cardiovascular events and mortality in patients undergoing coronary  
177 angiography: A comparison of invasive measurements and noninvasive estimates.  
178 *Hypertension*. 2021;77:571-581
- 179 6. Schwartz JE, Feig PU, Izzo JL, Jr. Pulse wave velocities derived from cuff ambulatory pulse wave  
180 analysis. *Hypertension*. 2019;74:111-116
- 181 7. Paiva AMG, Mota-Gomes MA, Brandão AA, Silveira FS, Silveira MS, Okawa RTP, Feitosa ADM,  
182 Sposito AC, Nadruz W, Jr. Reference values of office central blood pressure, pulse wave  
183 velocity, and augmentation index recorded by means of the mobil-o-graph pwa monitor.  
184 *Hypertension research : official journal of the Japanese Society of Hypertension*. 2020;43:1239-  
185 1248
- 186 8. Hoffmann F, Rabineau J, Mehrkens D, Gerlach DA, Moestl S, Johannes BW, Caiani EG, Migeotte  
187 PF, Jordan J, Tank J. Cardiac adaptations to 60 day head-down-tilt bed rest deconditioning.  
188 Findings from the agbresa study. *ESC heart failure*. 2020;8:729-744
- 189 9. Vaitkevicius PV, Fleg JL, Engel JH, O'Connor FC, Wright JG, Lakatta LE, Yin FC, Lakatta EG. Effects  
190 of age and aerobic capacity on arterial stiffness in healthy adults. *Circulation*. 1993;88:1456-  
191 1462
- 192 10. Jordan J, Nilsson PM, Kotsis V, Olsen MH, Grassi G, Yumuk V, Hauner H, Zahorska-Markiewicz  
193 B, Toplak H, Engeli S, Finer N. Joint scientific statement of the european association for the  
194 study of obesity and the european society of hypertension: Obesity and early vascular ageing.  
195 *J Hypertens*. 2015;33:425-434

197 **Figure 1 A-C**

198 Comparison of two different methodologies to assess pulse wave velocity (PWV) in  
199 two different cohorts.

200 1A: Correlation between estimated PWV and age in 129 Masters Athletes (empty  
201 circles) and in 24 AGBRESA-study participants (black squares).

202 1B: Regression analysis between the measured PWV and estimated PWV difference  
203 with age in 24 AGBRESA-study participants. Estimated deviated from measured PWV  
204 with increasing age ( $R^2$  0.44,  $p=0.07$ ).

205 1C: Quadratic regression analysis between estimated PWV and entered age in one  
206 man being in his 50s. We randomly entered age in decades from 20-80 and  
207 obtained measurements thrice at each entered age.



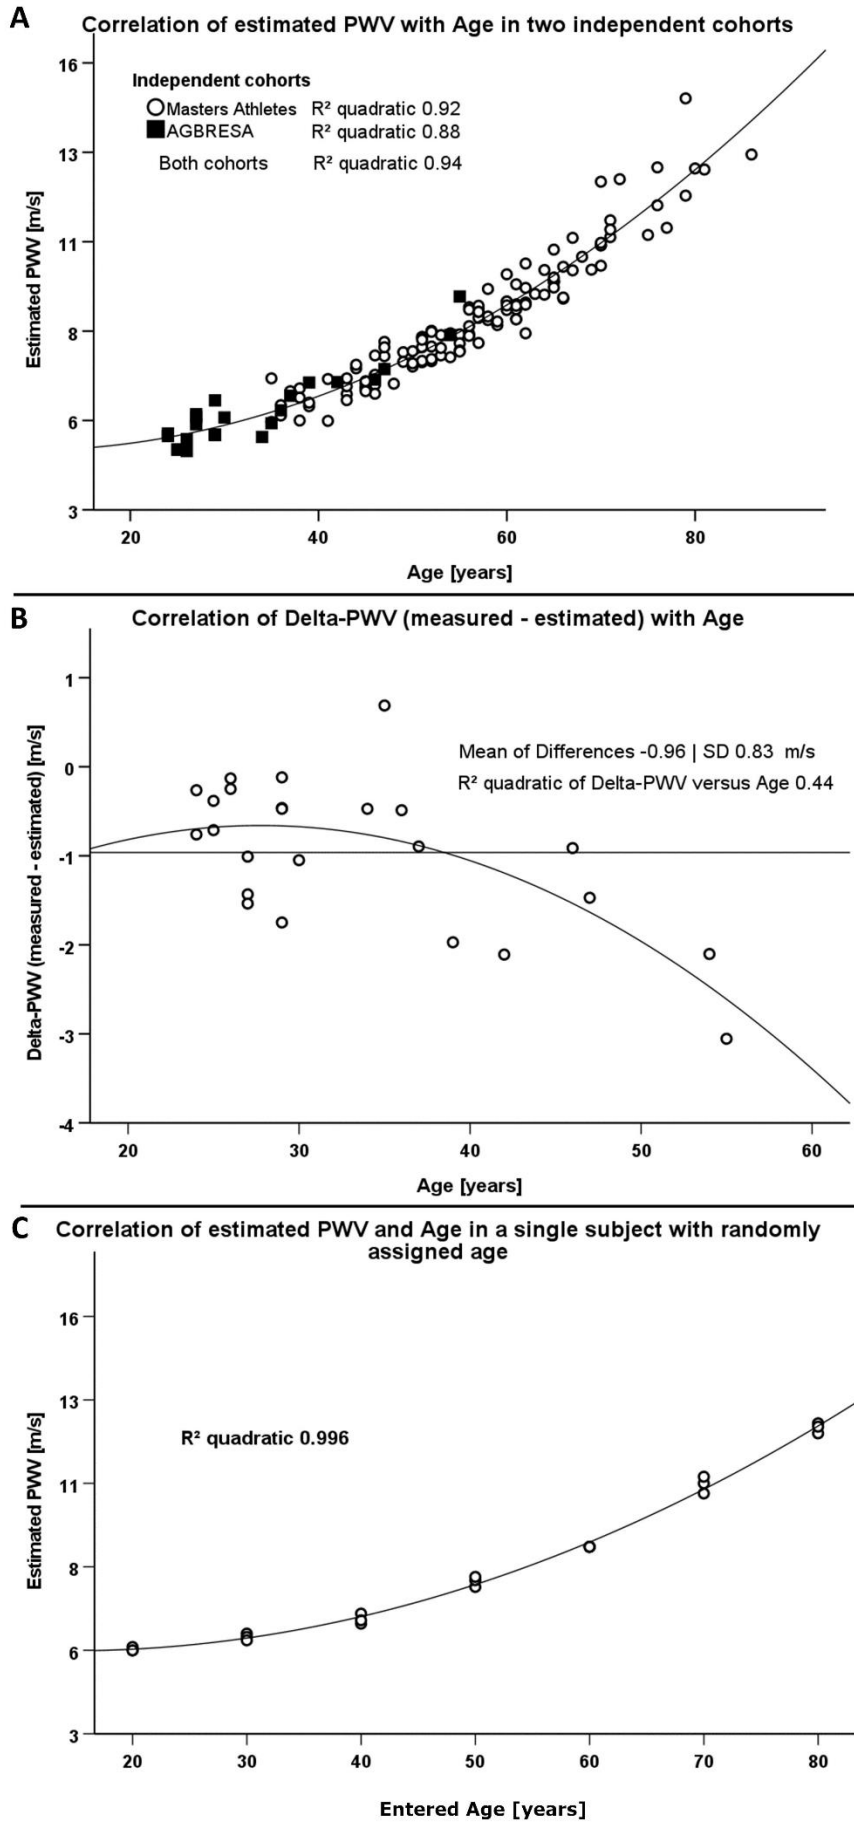

Source: https://medrxiv.org/content/10.1101/2022.01.13.22268898v1.full.pdf
